# Supplementary material for: Quinoidal π-extension of dipyranylidene derivatives: towards efficient dopants for n-type organic semiconductors
Source: Royal Society of Chemistry journal article supplement (doi:10.1039/d4qo00961d), 2024-01-01
Supplement: d4qo00961d1.pdf [file d4qo00961d1.pdf]

*Supporting Information for*

**Quinoidal  $\pi$ -extension of dipyranylidene derivatives: towards efficient dopants for n-type organic semiconductors**

Takaya Matsuo <sup>a,b</sup>, Kohsuke Kawabata <sup>a,b</sup>, Kazuo Takimiya <sup>\* a,b,c</sup>

<sup>a</sup> Department of Chemistry, Graduate School of Science, Tohoku University, 6-3 Aoba, Aramaki, Aoba-ku, Sendai, Miyagi 980-8578, Japan.

<sup>b</sup> Emergent Molecular Function Research Team, RIKEN Center for Emergent Matter Science (CEMS), 2-1 Hirosawa, Wako, Saitama 351-0198, Japan. E-mail: takimiya@riken.jp

<sup>c</sup> Advanced Institute for Materials Research (WPI-AIMR), Tohoku University, 2-1-1 Katahira, Aoba-ku, Sendai, Miyagi 980-8577 Japan

Contents

|                                                                                                                              |     |
|------------------------------------------------------------------------------------------------------------------------------|-----|
| 1. Estimation of $E_{\text{HOMOS}}$ of DP8 and DP9 by theoretical calculations                                               | S2  |
| 2. Single-crystal X-ray analysis of DP8 and DP9                                                                              | S3  |
| 3. Evaluation of thermoelectric properties                                                                                   | S4  |
| 4. NMR spectra of $\text{DP8}^{2+} \cdot (\text{BF}_4^-)_2$ , DP8, <b>2</b> , and $\text{DP9}^{2+} \cdot (\text{ClO}_4^-)_2$ | S5  |
| 5. Differential scanning calorimetry (DSC)                                                                                   | S8  |
| 6. Optimized molecular structures                                                                                            | S9  |
| 7. Diradical characters estimated by theoretical calculations                                                                | S12 |
| 8. References                                                                                                                | S13 |

## 1. Estimation of $E_{\text{HOMOS}}$ of DP8 and DP9 by theoretical calculations

Table S1. Calculated  $E_{\text{HOMOS}}$  of DP0, DP7, DP8, and DP9. <sup>1</sup>

| Compounds | $E_{\text{HOMO}} / \text{eV}^{\text{a}}$ |
|-----------|------------------------------------------|
| DP0       | -4.31                                    |
| DP7       | -3.56                                    |
| DP8       | -3.94                                    |
| DP9       | -3.29                                    |

<sup>a</sup> Calculated with the DFT method at the B3LYP / 6-311G\* level.

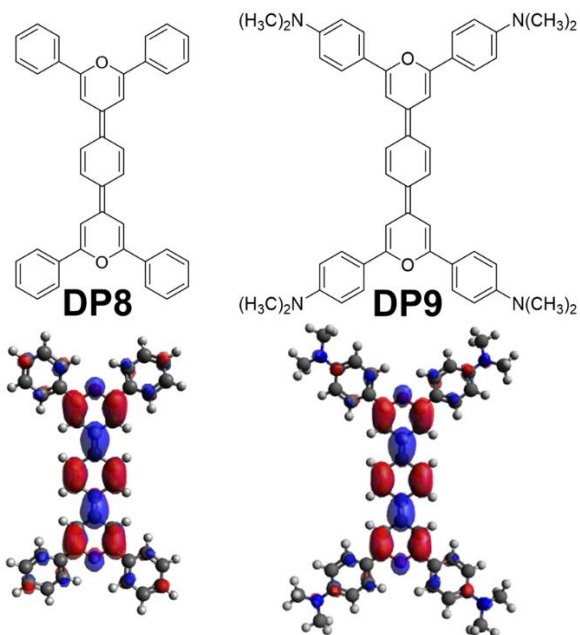

Fig. S1. HOMOs of DP8 and DP9.

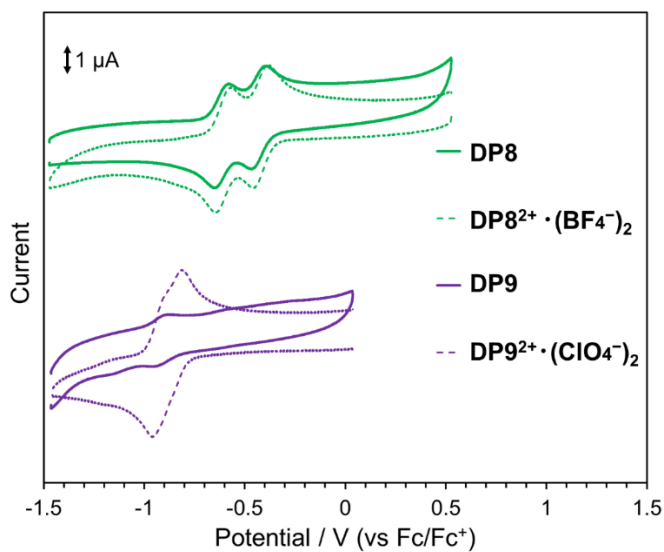

Fig. S2. Cyclic voltammograms of DP8<sup>2+</sup> · (BF<sub>4</sub><sup>-</sup>)<sub>2</sub>/DP8 (superimposed) and DP9<sup>2+</sup> · (ClO<sub>4</sub><sup>-</sup>)<sub>2</sub>/DP9 (superimposed).

## 2. Single-crystal X-ray analysis of DP8 and DP9

Table S2. Crystallographic data of DP8 and DP9.

| Formula                         | C <sub>40</sub> H <sub>28</sub> O <sub>2</sub> | C <sub>48</sub> H <sub>48</sub> N <sub>4</sub> O <sub>2</sub> |
|---------------------------------|------------------------------------------------|---------------------------------------------------------------|
| Formula weight                  | 540.62                                         | 712.94                                                        |
| Temperature / K                 | 293 (2)                                        | 100 (2)                                                       |
| Crystal habit                   | Plate                                          | Needle                                                        |
| Crystal system                  | <i>Monoclinic</i>                              | <i>Monoclinic</i>                                             |
| Space group                     | <i>I2/a</i>                                    | <i>P2<sub>1</sub>/n</i>                                       |
| <i>a</i> / Å                    | 17.0901(7)                                     | 6.3854(1)                                                     |
| <i>b</i> / Å                    | 5.7243(2)                                      | 7.7628(1)                                                     |
| <i>c</i> / Å                    | 29.7971(11)                                    | 37.5449(5)                                                    |
| $\beta$ / °                     | 104                                            | 90.494(1)                                                     |
| <i>V</i> / Å <sup>3</sup>       | 2827.04(19)                                    | 1860.98(5)                                                    |
| <i>Z</i>                        | 4                                              | 2                                                             |
| <i>R</i> , <i>R<sub>w</sub></i> | 0.0619, 0.1403                                 | 0.0499, 0.1386                                                |
| GOF                             | 1.053                                          | 1.034                                                         |
| Compound                        | DP8                                            | DP9                                                           |

## 3. Evaluation of thermoelectric properties

### 3.1. Methods <sup>2</sup>

Glass substrates were ultrasonicated in water for 3 min thrice and in acetone for 10 min, rinsed in boiling isopropanol, and then subjected to UV-ozone treatment for 30 min. Then, a pair of gold electrodes (thickness: 100 nm) (gap/width (*G/W*) = 0.1/1.5 mm for conductivity measurements or 0.5/8.5 mm for Seebeck coefficient measurements) were deposited on top of the glass substrates.

Two-terminal conductivity measurement was carried out inside a nitrogen-filled glovebox with a Keithley 4200-SCS semiconductor parameter analyzer. The conductivities reported in this work were obtained by averaging more than 5 devices. The thickness of the thin films was measured on a surface profiler AMBIOS TECHNOLOGY XP-100. Seebeck coefficients were measured in a nitrogen-filled glovebox with a Keithley 2182A nanovoltmeter. The temperature difference ( $\Delta T \leq 2$  K) across the sample was applied with two Peltier modules, and the thermovoltage ( $\Delta V$ ) was measured between the two electrodes. The Seebeck coefficients reported in this chapter were obtained by averaging 2 devices.

### 3.2. BBL

A solution of BBL in methanesulfonic acid (7.5 g L<sup>-1</sup>) was stirred at 70 °C for 2 h. The solution was spin-coated on the glass substrates at 2000 rpm for 30 sec. The BBL thin-films were dipped immediately into deionized water to remove residual methanesulfonic acid. The obtained BBL thin-films were dried first on a hot plate at 100 °C in ambient conditions, then thermally annealed on a hot plate at 200 °C in a nitrogen-filled glovebox for 1 h, and were cooled down to room temperature. The BBL thin-films were doped with the chloroform solution of DP8 (1.0 g L<sup>-1</sup>), DP9 (1.0 g L<sup>-1</sup>), and *N*-DMBI (10 g L<sup>-1</sup>) by placing the solution on top of the pristine BBL-thin-films, waiting 5 seconds,

and then spinning the excess solutions off at 1000 rpm.

### 3.3. N2200

Chloroform solutions of N2200 ( $2.5 \sim 10 \text{ g L}^{-1}$ ), DP9 ( $1.0 \text{ g L}^{-1}$ ) and *N*-DMBI ( $0.42 \sim 1.1 \text{ g L}^{-1}$ ) were prepared separately. Aliquots of dopants and polymer solutions were mixed at room temperature to reach a concentration of N2200 ( $2 \text{ g L}^{-1}$ ) with DP9, and ( $5 \text{ g L}^{-1}$ ) with *N*-DMBI, and then stirring for 15 min. The solution of N2200-DP2 was spin-coated on glass substrates at 200 rpm for 120 sec and the solution of N2200-*N*-DMBI was spin-coated on glass substrates at 1000 rpm for 35 sec, and the resulting thin films on the substrates were annealed at  $150 \text{ }^\circ\text{C}$  for 15 min and allowed to cool to room temperature.

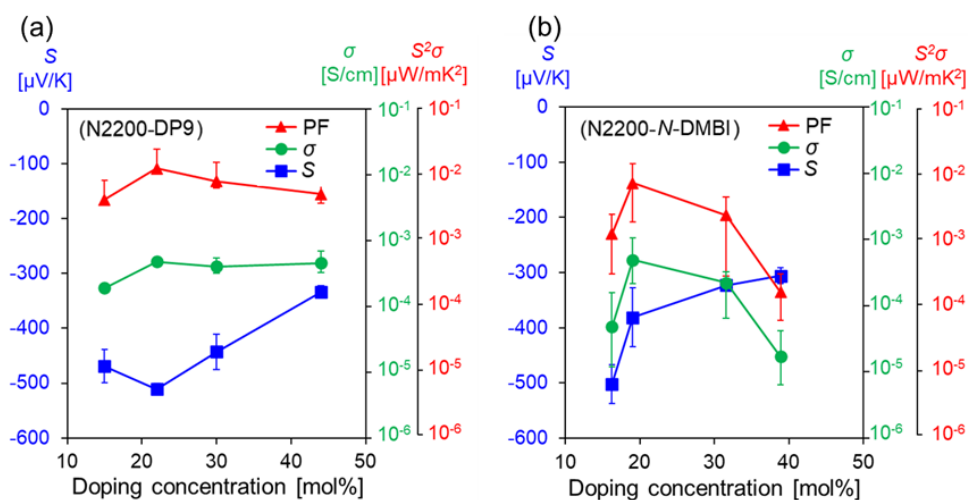

Fig. S3. Properties of doped N2200 thin films doped with DP9 (a), and *N*-DMBI (b) depending on the doping concentration.

#### 4. NMR spectra of $\text{DP8}^{2+} \cdot (\text{BF}_4^-)_2$ , $\text{DP8}$ , $\mathbf{2}$ , and $\text{DP9}^{2+} \cdot (\text{ClO}_4^-)_2$

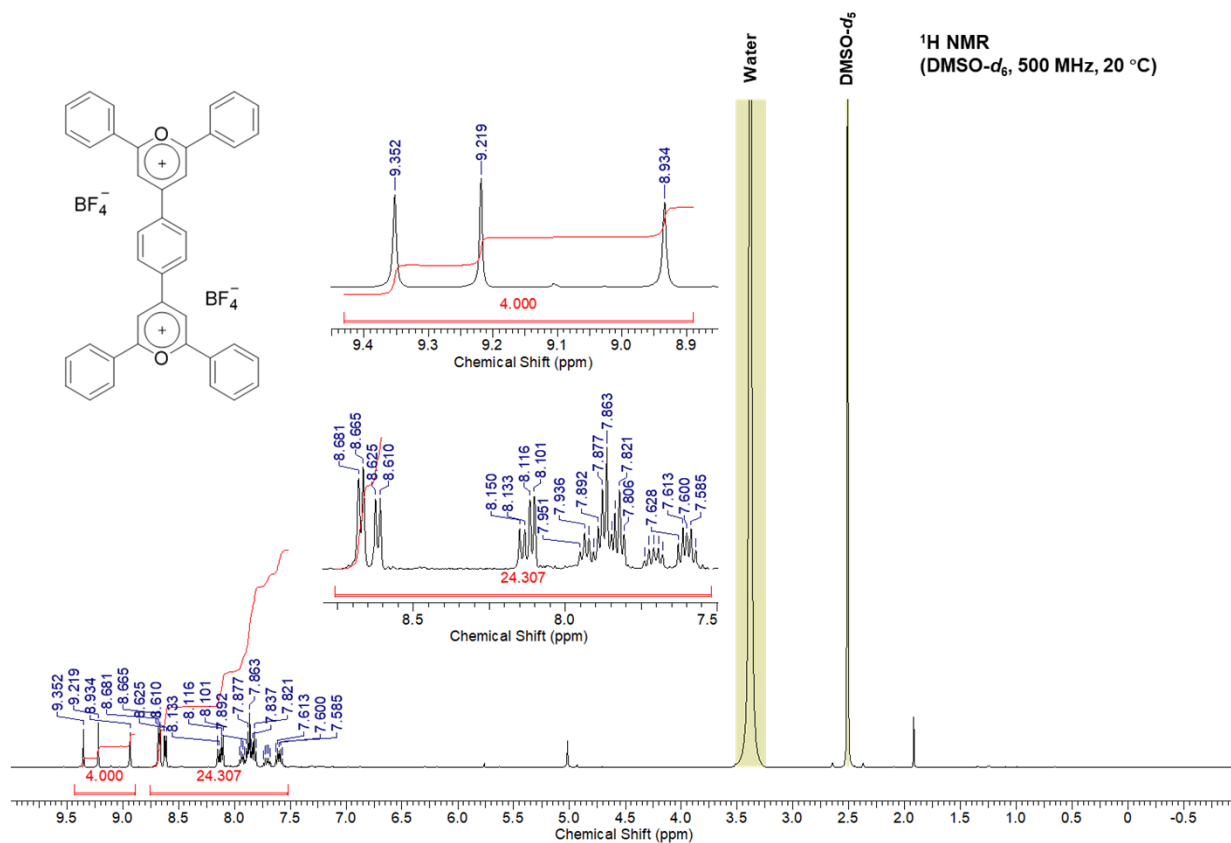

Fig. S4.  $^1\text{H}$  NMR spectrum of  $\text{DP8}^{2+} \cdot (\text{BF}_4^-)_2$ .

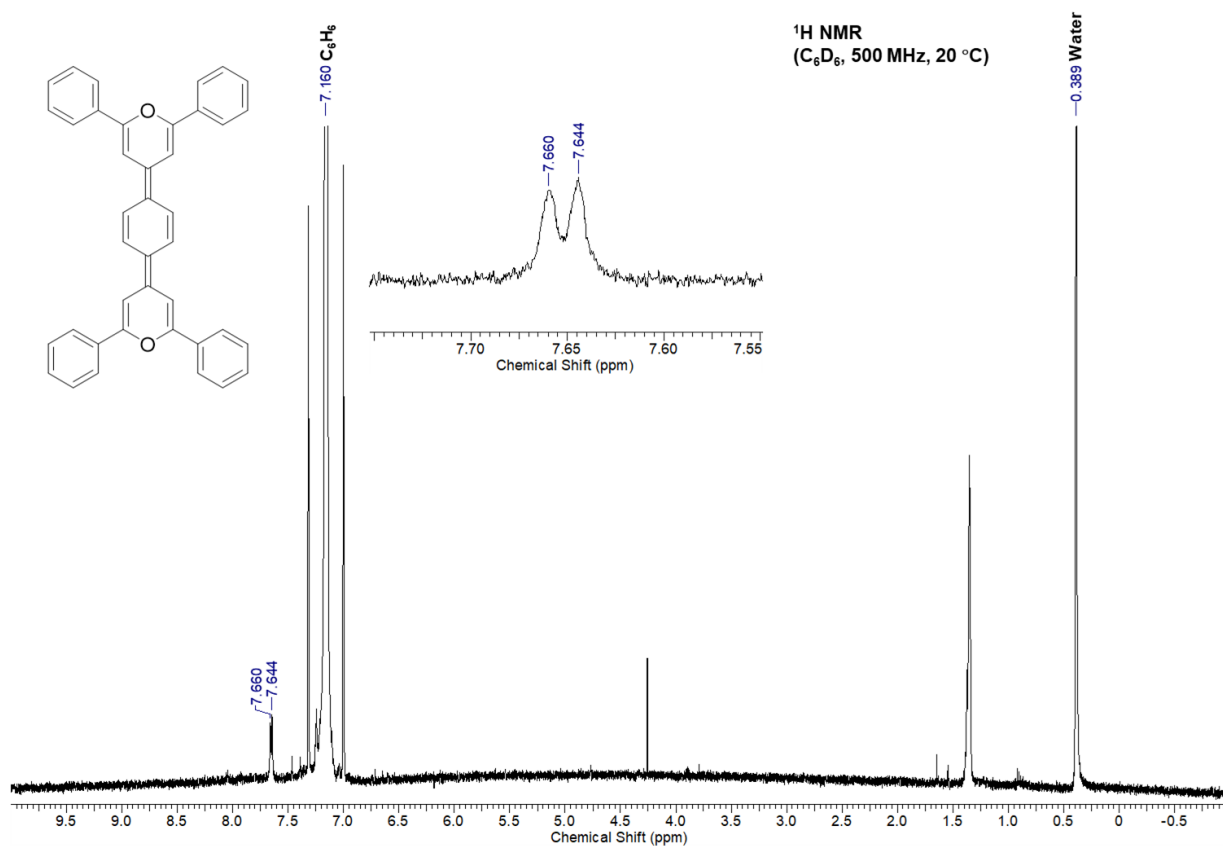

Fig. S5.  $^1\text{H}$  NMR spectrum of  $\text{DP8}$ .

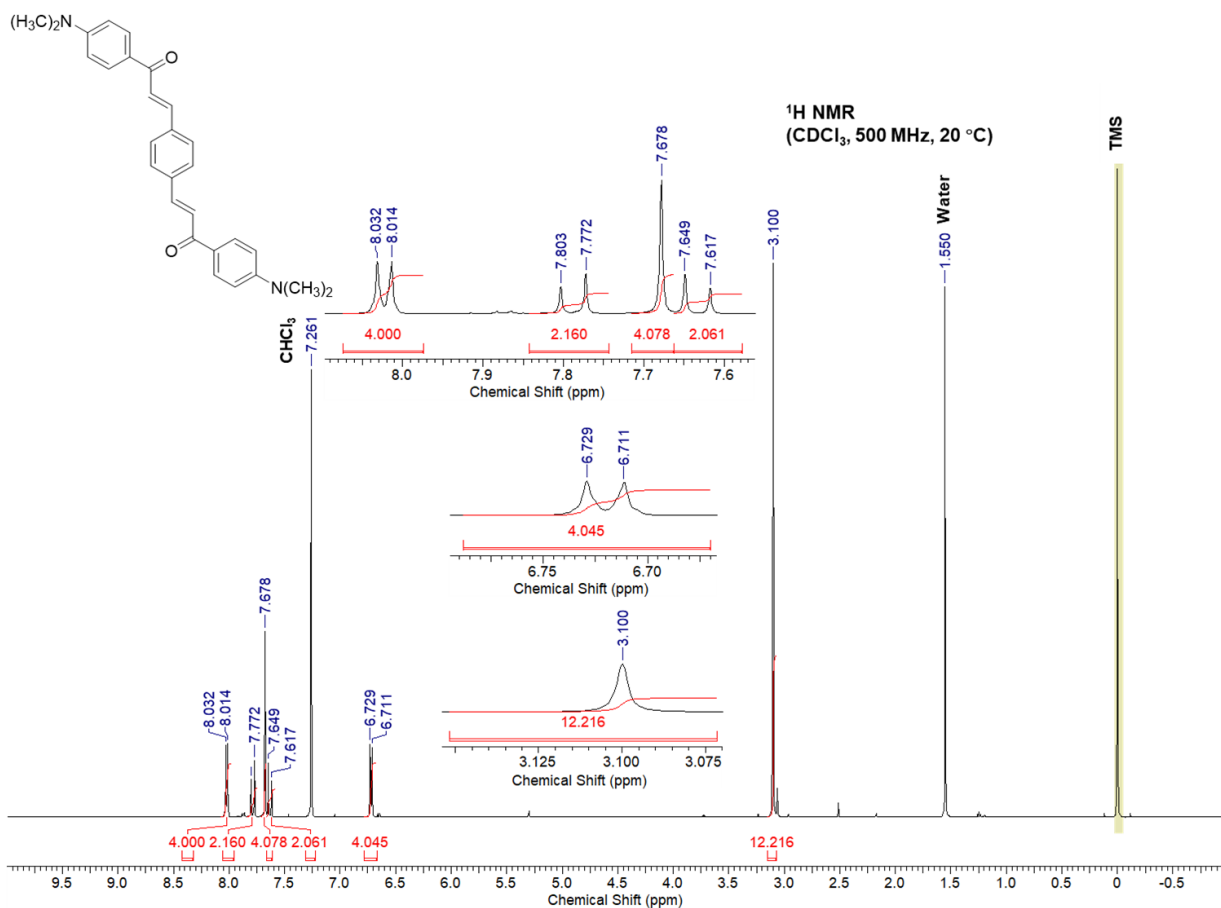

Fig. S6. <sup>1</sup>H NMR spectrum of **2**.

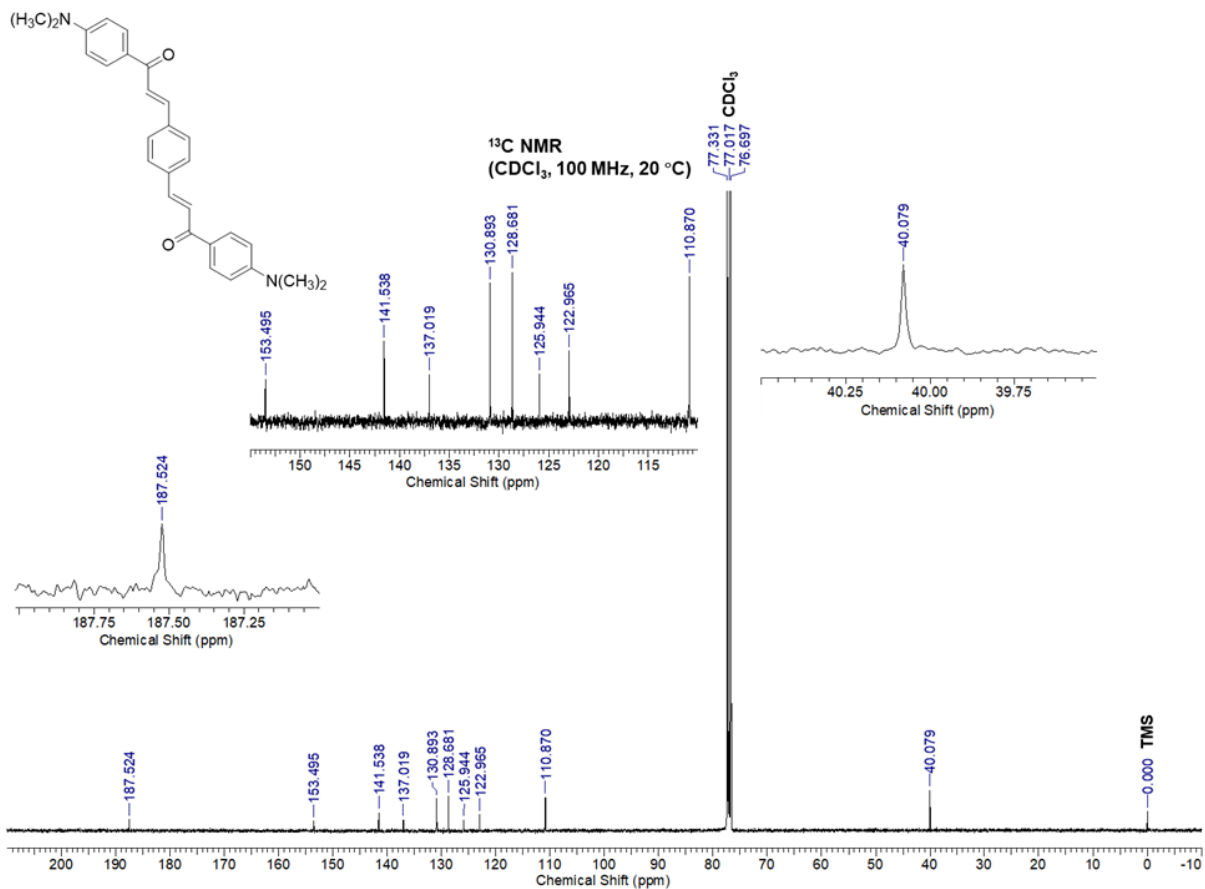

Fig. S7. <sup>13</sup>C NMR spectrum of **2**.

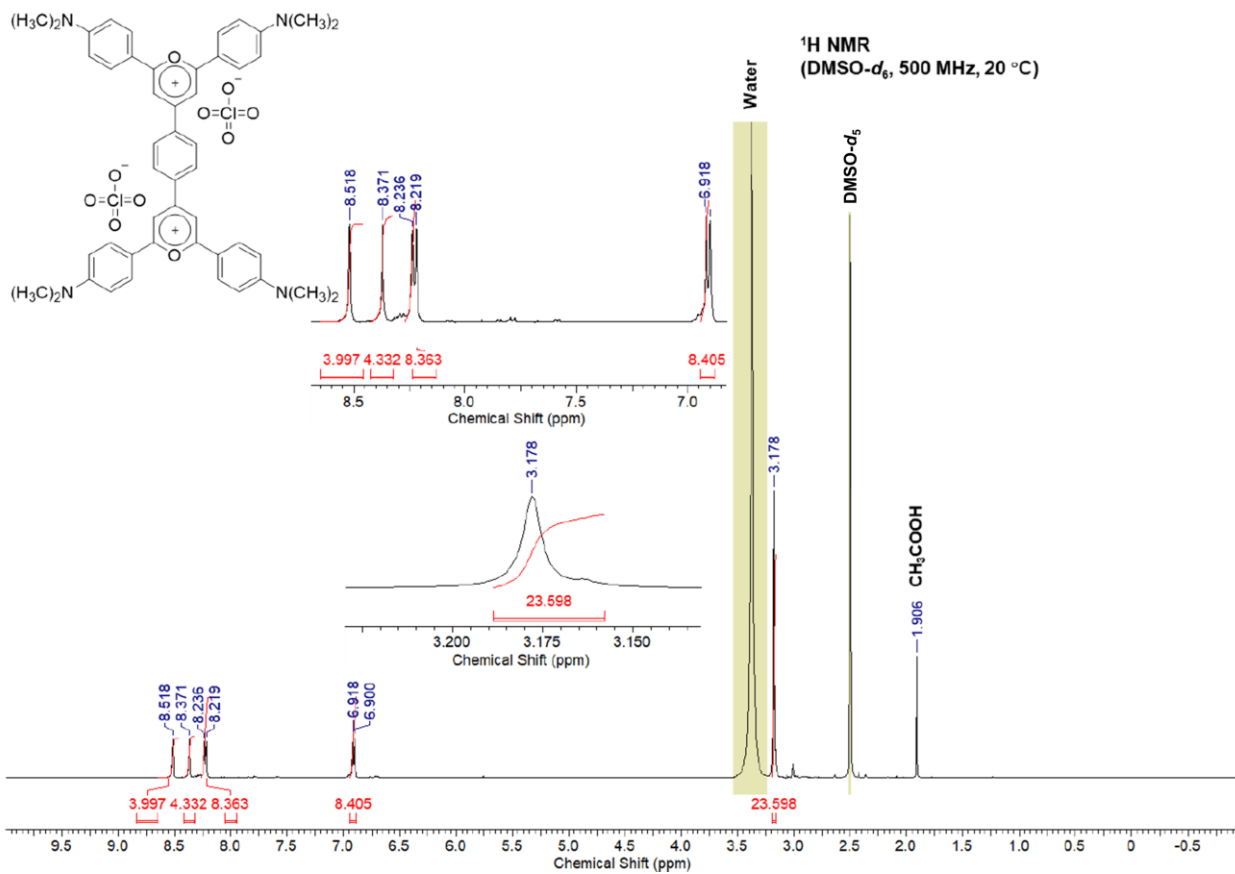

Fig. S8. <sup>1</sup>H NMR spectrum of DP9<sup>2+</sup> · (ClO<sub>4</sub><sup>-</sup>)<sub>2</sub>.

## 5. Differential scanning calorimetry (DSC)

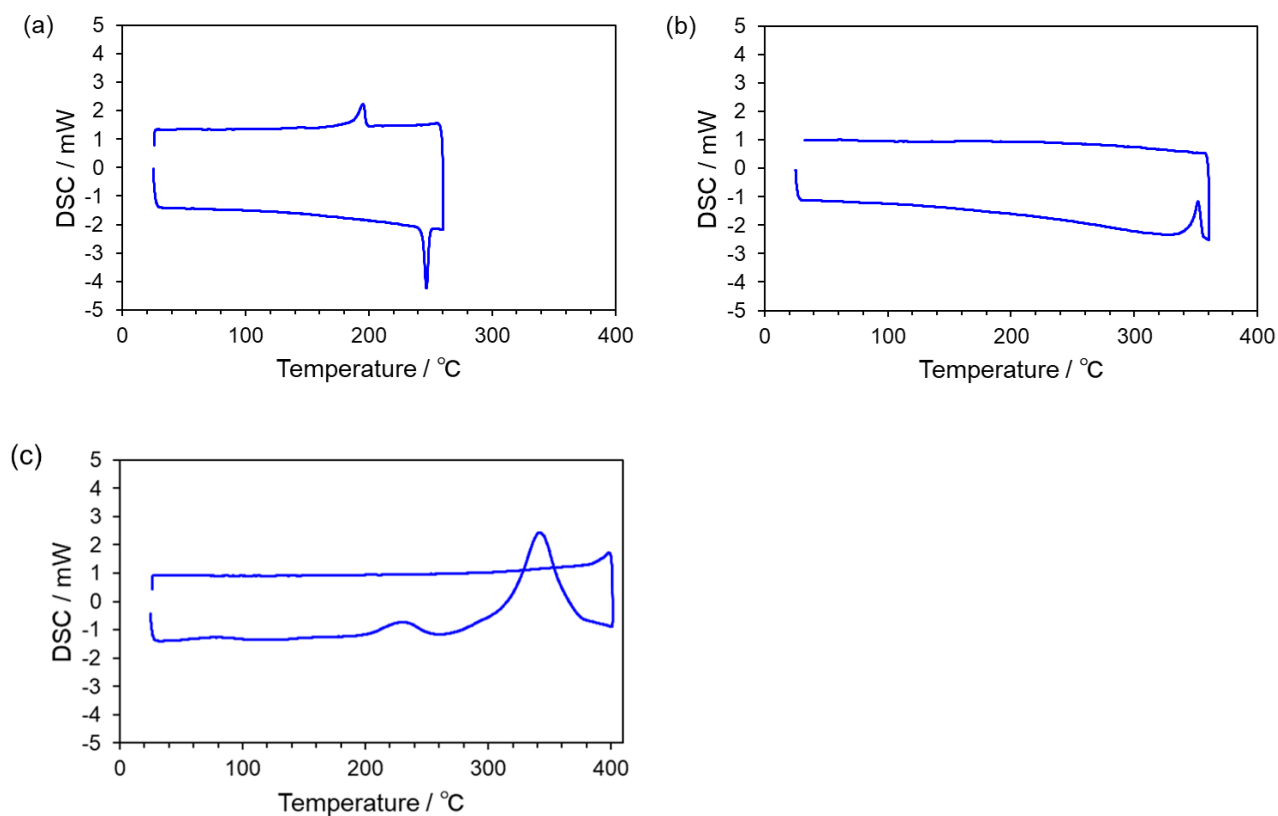

Fig. S9. Differential scanning calorimetry (DSC) curves of **2** (a), DP8 (b), and (c) DP9<sup>2+</sup>·(ClO<sub>4</sub><sup>-</sup>)<sub>2</sub> recorded under the nitrogen flow (50 mL min<sup>-1</sup>) at the heating and cooling rate of 10 °C min<sup>-1</sup>. Note that DP8 and DP9<sup>2+</sup>·(ClO<sub>4</sub><sup>-</sup>)<sub>2</sub> showed only an exothermic peak, which can be assigned to decomposition.



## 6. Optimized molecular structures

Table S3. Optimized Cartesian coordinates (Å) of DP8 calculated with the B3LYP / 6-311G\* level (no imaginary frequencies). Total energy is  $-1691.8801$  hartree.

| Atoms | X         | Y         | Z         |
|-------|-----------|-----------|-----------|
| C     | -5.084203 | -5.980124 | 0.86896   |
| C     | -4.672491 | -7.234618 | 0.575488  |
| C     | -5.018991 | -8.30589  | 1.306756  |
| C     | -5.805361 | -8.161235 | 2.380587  |
| C     | -6.231648 | -6.933242 | 2.701943  |
| C     | -5.875296 | -5.872221 | 1.959083  |
| C     | -1.377817 | -4.032586 | -4.787001 |
| C     | -1.038934 | -5.31854  | -4.943458 |
| C     | -1.508171 | -6.215877 | -4.067645 |
| C     | -2.300618 | -5.822089 | -3.058    |
| C     | -2.171767 | -3.655925 | -3.770956 |
| C     | -2.663134 | -4.532936 | -2.868028 |
| C     | -4.68192  | -4.954934 | 0.068281  |
| O     | -3.877667 | -5.243469 | -0.997046 |
| C     | -3.470207 | -4.228249 | -1.814542 |
| C     | -3.87902  | -2.97178  | -1.542249 |
| C     | -4.671844 | -2.633974 | -0.500974 |
| C     | -5.045694 | -3.672974 | 0.278563  |
| C     | -6.275027 | 2.633737  | 0.500266  |
| C     | -6.104345 | 3.632706  | -0.394103 |
| C     | -6.479211 | 4.91251   | -0.190175 |
| O     | -7.069323 | 5.243309  | 0.996164  |
| C     | -7.262599 | 4.270295  | 1.934721  |
| C     | -6.864803 | 3.011627  | 1.656262  |
| C     | -6.300352 | 5.89367   | -1.117174 |
| C     | -7.846139 | 4.619005  | 3.11448   |
| C     | -8.206816 | 5.908503  | 3.305531  |
| C     | -8.786663 | 6.344063  | 4.435353  |
| C     | -9.0333   | 5.490508  | 5.43686   |
| C     | -8.690373 | 4.205356  | 5.282669  |
| C     | -8.110888 | 3.786534  | 4.145388  |
| C     | -6.713845 | 7.147792  | -0.824664 |
| C     | -6.579885 | 8.177274  | -1.675915 |
| C     | -6.016034 | 7.988884  | -2.875501 |
| C     | -5.593933 | 6.760061  | -3.199275 |
| C     | -5.735869 | 5.741182  | -2.335349 |
| C     | -5.883806 | 1.348197  | 0.256003  |
| C     | -5.192234 | 0.958513  | -0.835573 |
| C     | -4.804064 | -0.306564 | -1.074449 |
| C     | -5.063069 | -1.348483 | -0.256537 |
| C     | -5.757551 | -0.959379 | 0.8334    |
| C     | -6.139859 | 0.306858  | 1.075599  |
| H     | -4.023013 | -7.448127 | -0.290363 |
| H     | -4.658083 | -9.310414 | 1.027075  |
| H     | -6.09534  | -9.034749 | 2.987416  |
| H     | -6.880041 | -6.800029 | 3.585137  |
| H     | -6.282557 | -4.915163 | 2.316713  |
| H     | -0.998233 | -3.282658 | -5.502348 |
| H     | -0.387592 | -5.631983 | -5.775837 |
| H     | -1.239415 | -7.280012 | -4.181182 |
| H     | -2.639668 | -6.628667 | -2.38603  |
| H     | -2.384153 | -2.577171 | -3.741674 |

|   |           |           |           |
|---|-----------|-----------|-----------|
| H | -3.52567  | -2.181443 | -2.205241 |
| H | -5.699318 | -3.476762 | 1.129046  |
| H | -5.648528 | 3.397525  | -1.356384 |
| H | -7.020231 | 2.26026   | 2.431056  |
| H | -8.041892 | 6.680905  | 2.535286  |
| H | -9.062737 | 7.406757  | 4.544735  |
| H | -9.508962 | 5.838543  | 6.368496  |
| H | -8.888687 | 3.491113  | 6.100411  |
| H | -7.874034 | 2.712606  | 4.129905  |
| H | -7.189335 | 7.39548   | 0.139531  |
| H | -6.933404 | 9.183233  | -1.392021 |
| H | -5.901565 | 8.827856  | -3.581439 |
| H | -5.12684  | 6.591184  | -4.18492  |
| H | -5.353247 | 4.77929   | -2.706926 |
| H | -4.877863 | 1.664693  | -1.618612 |
| H | -4.256854 | -0.421602 | -2.022071 |
| H | -6.055737 | -1.662405 | 1.625568  |
| H | -6.703155 | 0.418723  | 2.014147  |

Table S4. Optimized Cartesian coordinates (Å) of DP9 calculated with the B3LYP / 6-311G\* level (no imaginary frequencies). Total energy is  $-2227.8669$  hartree.

| Atoms | X         | Y         | Z         |
|-------|-----------|-----------|-----------|
| C     | -4.512491 | -5.998614 | 0.748027  |
| C     | -4.112486 | -7.255013 | 0.464994  |
| C     | -4.539333 | -8.331712 | 1.145101  |
| C     | -5.407048 | -8.255289 | 2.174461  |
| C     | -5.803266 | -6.99733  | 2.456656  |
| C     | -5.377703 | -5.918219 | 1.777764  |
| C     | -0.357158 | -3.999884 | -4.562568 |
| C     | 0.017161  | -5.279528 | -4.766203 |
| C     | -0.561705 | -6.154448 | -3.918988 |
| C     | -1.427988 | -5.783829 | -2.96178  |
| C     | -1.223823 | -3.626299 | -3.605571 |
| C     | -1.798393 | -4.503069 | -2.75908  |
| C     | -4.034358 | -4.962341 | 0.007086  |
| O     | -3.158745 | -5.239963 | -1.00344  |
| C     | -2.67961  | -4.21193  | -1.764    |
| C     | -3.09055  | -2.955747 | -1.494377 |
| C     | -3.950918 | -2.631121 | -0.503983 |
| C     | -4.394113 | -3.680396 | 0.223392  |
| C     | -5.54869  | 2.630993  | 0.503489  |
| C     | -5.398434 | 3.624987  | -0.399792 |
| C     | -5.775384 | 4.903696  | -0.193804 |
| O     | -6.34087  | 5.239819  | 1.00289   |
| C     | -6.509901 | 4.27033   | 1.949648  |
| C     | -6.116173 | 3.010854  | 1.669746  |
| C     | -5.624927 | 5.878102  | -1.131525 |
| C     | -7.063372 | 4.623272  | 3.141504  |
| C     | -7.42393  | 5.905884  | 3.350173  |
| C     | -7.972708 | 6.336392  | 4.498007  |
| C     | -8.214462 | 5.525076  | 5.547603  |
| C     | -7.855189 | 4.242596  | 5.334921  |
| C     | -7.305819 | 3.809159  | 4.187391  |
| C     | -6.034756 | 7.132648  | -0.854462 |
| C     | -5.925441 | 8.14943   | -1.725223 |
| C     | -5.394821 | 8.009381  | -2.956961 |
| C     | -4.983549 | 6.754262  | -3.230073 |

|   |           |            |           |
|---|-----------|------------|-----------|
| C | -5.091834 | 5.735008   | -2.360649 |
| C | -5.15854  | 1.346088   | 0.257491  |
| C | -4.442303 | 0.964699   | -0.820918 |
| C | -4.053512 | -0.299921  | -1.060456 |
| C | -4.341073 | -1.346192  | -0.257976 |
| C | -5.061869 | -0.965679  | 0.817675  |
| C | -5.441571 | 0.300677   | 1.062698  |
| N | -5.290985 | 8.978909   | -3.789737 |
| C | -4.693284 | 8.738327   | -5.129396 |
| C | -5.771091 | 10.332583  | -3.406349 |
| N | 0.845324  | -5.631714  | -5.679647 |
| C | 1.203291  | -7.066194  | -5.834629 |
| C | 1.439078  | -4.60188   | -6.572256 |
| N | -5.816361 | -9.28243   | 2.823843  |
| C | -6.775252 | -9.10993   | 3.94665   |
| C | -5.328224 | -10.634603 | 2.445278  |
| N | -8.73714  | 5.934918   | 6.64446   |
| C | -8.969761 | 4.973239   | 7.753925  |
| C | -9.103154 | 7.367905   | 6.794561  |
| H | -3.403168 | -7.458844  | -0.355937 |
| H | -4.128176 | -9.294332  | 0.800539  |
| H | -6.510803 | -6.784137  | 3.274482  |
| H | -5.792077 | -4.961147  | 2.129108  |
| H | 0.035858  | -3.177314  | -5.182116 |
| H | -0.352394 | -7.235398  | -3.965639 |
| H | -1.82725  | -6.601171  | -2.33637  |
| H | -1.428188 | -2.545615  | -3.566802 |
| H | -2.675279 | -2.154469  | -2.107434 |
| H | -5.10948  | -3.493357  | 1.025641  |
| H | -4.967255 | 3.384388   | -1.372672 |
| H | -6.247257 | 2.263178   | 2.453387  |
| H | -7.279788 | 6.675097   | 2.57163   |
| H | -8.214651 | 7.41115    | 4.525169  |
| H | -7.995569 | 3.4677     | 6.106115  |
| H | -7.068511 | 2.734686   | 4.168288  |
| H | -6.488964 | 7.384615   | 0.119601  |
| H | -6.30397  | 9.118208   | -1.361094 |
| H | -4.528634 | 6.493346   | -4.199557 |
| H | -4.710341 | 4.771692   | -2.731635 |
| H | -4.10227  | 1.679254   | -1.585716 |
| H | -3.485686 | -0.413183  | -1.996331 |
| H | -5.379619 | -1.676052  | 1.595835  |
| H | -6.031642 | 0.409789   | 1.985238  |
| H | -5.296655 | 8.011894   | -5.720079 |
| H | -4.676874 | 9.674713   | -5.729638 |
| H | -3.631179 | 8.412625   | -5.048897 |
| H | -5.202319 | 10.735692  | -2.537648 |
| H | -5.61155  | 11.058371  | -4.234099 |
| H | -6.867464 | 10.335359  | -3.209736 |
| H | 1.708272  | -7.460746  | -4.923602 |
| H | 0.314444  | -7.681061  | -6.103936 |
| H | 1.929322  | -7.205566  | -6.665784 |
| H | 0.658069  | -4.089785  | -7.179264 |
| H | 2.051468  | -3.869599  | -5.998285 |
| H | 2.13434   | -5.066857  | -7.305609 |
| H | -7.74068  | -8.679621  | 3.595286  |
| H | -7.031291 | -10.091511 | 4.403061  |
| H | -6.334818 | -8.500566  | 4.768435  |
| H | -4.226075 | -10.722297 | 2.580171  |

|   |           |            |          |
|---|-----------|------------|----------|
| H | -5.775048 | -11.414657 | 3.100421 |
| H | -5.632321 | -10.901709 | 1.407573 |
| H | -8.013309 | 4.536873   | 8.12194  |
| H | -9.425411 | 5.483419   | 8.631106 |
| H | -9.691434 | 4.177827   | 7.45877  |
| H | -9.88532  | 7.66767    | 6.060408 |
| H | -9.541817 | 7.5614     | 7.798298 |
| H | -8.207578 | 8.026485   | 6.724603 |

## 7. Diradical characters estimated by theoretical calculations

The diradical character ( $y$ ) of DP8 and DP9 and their non-extended counterparts (DP0 and DP7) were calculated with the Gaussian 16 program<sup>1</sup> using the RB3LYP/6-311G\* level of theory for the structural optimization and the LC-UB3LYP/6-31+G\* level of theory for the occupancy of the highest occupied natural orbital ( $n_{\text{HONO}}$ ) and the lowest unoccupied natural orbital ( $n_{\text{LUNO}}$ ) by following equation;<sup>3</sup>

$$y = 1 - \frac{2T}{1+T^2} \quad \text{where } T = \frac{n_{\text{HONO}} - n_{\text{LUNO}}}{2}$$

As summarized in Fig. S10, the  $y$  values of DP8 and DP9, 0.21 and 0.20, respectively, indicated that the open-shell diradical character could not be ignored in DP8 and DP9, which are contrasted to their non-extended counterparts.

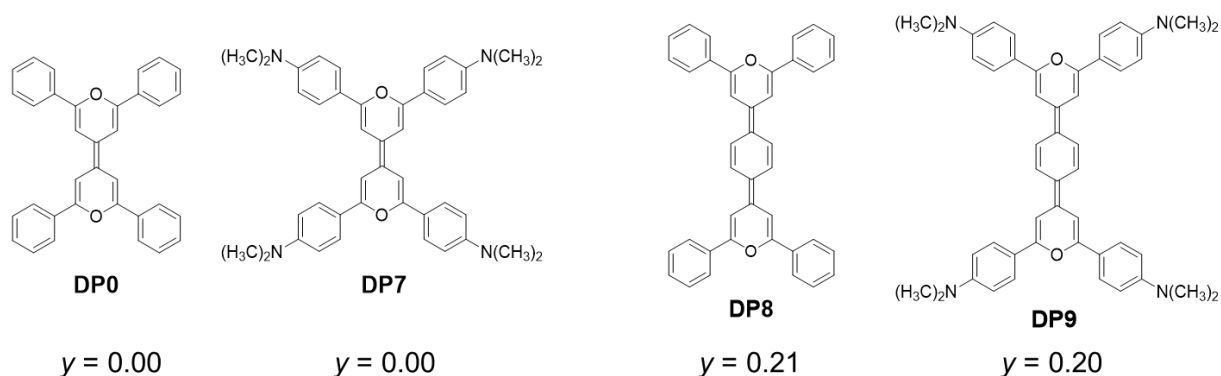

Fig. S10. Calculated diradical character ( $y$ ) of DP8 and DP9 together with their non-extended counterparts.

## 8. References

1. M. J. Frisch, G. W. Trucks, H. B. Schlegel, G. E. Scuseria, M. A. Robb, J. R. Cheeseman, G. Scalmani, V. Barone, G. A. Petersson, H. Nakatsuji, X. Li, M. Caricato, A. V. Marenich, J. Bloino, B. G. Janesko, R. Gomperts, B. Mennucci, H. P. Hratchian, J. V. Ortiz, A. F. Izmaylov, J. L. Sonnenberg, D. Williams-Young, F. Ding, F. Lipparini, F. Egidi, J. Goings, B. Peng, A. Petrone, T. Henderson, D. Ranasinghe, V. G. Zakrzewski, J. Gao, N. Rega, G. Zheng, W. Liang, M. Hada, M. Ehara, K. Toyota, R. Fukuda, J. Hasegawa, M. Ishida, T. Nakajima, Y. Honda, O. Kitao, H. Nakai, T. Vreven, K. Throssell, J. A. Montgomery Jr., J. E. Peralta, F. Ogliaro, M. J. Bearpark, J. J. Heyd, E. N. Brothers, K. N. Kudin, V. N. Staroverov, T. A. Keith, R. Kobayashi, J. Normand, K. Raghavachari, A. P. Rendell, J. C. Burant, S. S. Iyengar, J. Tomasi, M. Cossi, J. M. Millam, M. Klene, C. Adamo, R. Cammi, J. W. Ochterski, R. L. Martin, K. Morokuma, O. Farkas, J. B. Foresman and D. J. Fox, Gaussian 16 Rev. C.01. *Journal*, 2016.
2. T. Matsuo, K. Kawabata and K. Takimiya, Highly Electron-Donating Bipyranlydene Derivatives: Potential n-Type Dopants for Organic Thermoelectrics, *Adv. Energy Sustainability Res.*, 2021, **2**, 2100084.
3. S. Yamanaka, M. Okumura, M. Nakano and K. Yamaguchi, EHF theory of chemical reactions Part 4. UNO CASSCF, UNO CASPT2 and R(U)HF coupled-cluster (CC) wavefunctions, *J. Mol. Struct.: THEOCHEM*, 1994, **310**, 205-218.
